# Supplementary material
Source: PubMed Central journal article supplement (PMC3946576)
Supplement: NIHMS526715-supplement-01.pdf [file NIHMS526715-supplement-01.pdf]

**Table 4: Risk Factors for  $\geq 2$  Lines Improvement of Macular Edema-Induced Reduction of Visual Acuity**

|                                  |                    | N    | Estimated Proportion Resolved (95% Confidence Interval) | Unadjusted         |              | Adjusted**         |              |
|----------------------------------|--------------------|------|---------------------------------------------------------|--------------------|--------------|--------------------|--------------|
|                                  |                    |      |                                                         | 6-Month            | Hazard Ratio | p-value            | Hazard Ratio |
| All                              | All                | 1510 | 51.9% (49.0% - 54.6%)                                   | n/a                |              |                    |              |
| Age at uveitis diagnosis         | <26                | 424  | 50.5% (45.7% - 54.9%)                                   | 1.00               | 0.71         | 1.00               | 0.57         |
|                                  | 26-45              | 589  | 53.3% (49.2% - 57.2%)                                   | 1.08 (0.93 - 1.26) |              | 1.10 (0.94 - 1.29) |              |
|                                  | 46-65              | 366  | 50.6% (45.5% - 55.2%)                                   | 1.00 (0.84 - 1.19) |              | 0.98 (0.81 - 1.19) |              |
|                                  | >65                | 131  | 53.1% (44.4% - 60.4%)                                   | 1.08 (0.84 - 1.36) |              | 1.05 (0.81 - 1.36) |              |
| Sex                              | Male               | 496  | 50.4% (45.9% - 54.6%)                                   | 1.00               | 0.40         | 1.00               | 0.48         |
|                                  | Female             | 1014 | 52.6% (49.3% - 55.6%)                                   | 1.06 (0.93 - 1.21) |              | 1.06 (0.92 - 1.21) |              |
| Race category                    | White              | 1159 | 52.3% (49.2% - 55.2%)                                   | 1.00               | 0.46         | 1.00               | 0.56         |
|                                  | Black              | 200  | 47.7% (40.5% - 54.0%)                                   | 0.88 (0.72 - 1.05) |              | 1.01 (0.83 - 1.24) |              |
|                                  | Hispanic           | 72   | 57.4% (44.4% - 67.3%)                                   | 1.15 (0.86 - 1.51) |              | 1.23 (0.91 - 1.63) |              |
|                                  | Other              | 79   | 51.3% (39.6% - 60.8%)                                   | 0.97 (0.72 - 1.28) |              | 1.01 (0.74 - 1.34) |              |
| Smoking                          | Never              | 759  | 54.2% (50.3% - 57.8%)                                   | 1.00               | 0.02         | 1.00               | 0.75         |
|                                  | Past               | 188  | 50.3% (44.2% - 55.8%)                                   | 0.90 (0.74 - 1.08) |              | 1.02 (0.84 - 1.24) |              |
|                                  | Current            | 382  | 52.7% (47.7% - 57.2%)                                   | 0.96 (0.83 - 1.11) |              | 0.97 (0.83 - 1.13) |              |
|                                  | Unknown            | 181  | 42.7% (35.9% - 48.8%)                                   | 0.71 (0.58 - 0.87) |              | 0.88 (0.70 - 1.10) |              |
| Laterality of uveitis            | Unilateral         | 189  | 56.7% (48.8% - 63.3%)                                   | 1.00               | 0.15         | 1.00               | >0.99        |
|                                  | Bilateral          | 1321 | 51.3% (48.3% - 54.1%)                                   | 0.86 (0.72 - 1.04) |              | 1.00 (0.83 - 1.22) |              |
| Visual Acuity at Diagnosis of ME | Better than 20/200 | 1122 | 48.9% (45.8% - 51.8%)                                   | 1.00               | <0.001       | 1.00               | <0.001       |
|                                  | 20/200 or worse    | 388  | 60.9% (55.6% - 65.6%)                                   | 1.40 (1.22 - 1.60) |              | 1.46 (1.26 - 1.68) |              |
| Site of Uveitis                  | Anterior           | 424  | 60.7% (55.6% - 65.2%)                                   | 1.00               | <0.001       | 1.00               | 0.02         |
|                                  | Intermediate       | 533  | 50.4% (46.3% - 54.2%)                                   | 0.75 (0.65 - 0.87) |              | 0.83 (0.70 - 1.00) |              |
|                                  | Posterior          | 285  | 49.6% (43.6% - 55.0%)                                   | 0.74 (0.61 - 0.88) |              | 0.76 (0.63 - 0.93) |              |
|                                  | Panuveitis         | 268  | 44.0% (38.4% - 49.2%)                                   | 0.62 (0.51 - 0.75) |              | 0.73 (0.59 - 0.89) |              |
| Overall Activity at ME Diagnosis | Inactive           | 436  | 46.5% (41.9% - 50.6%)                                   | 1.00               | <0.001       | 1.00               | <0.01        |
|                                  | Slightly active    | 211  | 41.0% (35.2% - 46.4%)                                   | 0.85 (0.68 - 1.04) |              | 0.89 (0.70 - 1.13) |              |
|                                  | Active             | 863  | 57.6% (54.0% - 60.9%)                                   | 1.37 (1.20 - 1.58) |              | 1.27 (1.08 - 1.50) |              |

**Table 4: Risk Factors for  $\geq 2$  Lines Improvement of Macular Edema-Induced Reduction of Visual Acuity**

|                                  |                                 |          | <b>Estimated Proportion Resolved (95% Confidence Interval)</b> | <b>Unadjusted</b>   |                   | <b>Adjusted**</b>   |                   |
|----------------------------------|---------------------------------|----------|----------------------------------------------------------------|---------------------|-------------------|---------------------|-------------------|
|                                  |                                 | <b>N</b> | <b>6-Month</b>                                                 | <b>Hazard Ratio</b> | <b>p-value</b>    | <b>Hazard Ratio</b> | <b>p-value</b>    |
| Change in Anterior Chamber Cells | $\geq 2$ steps better (or to 0) | *        | 65.2% (60.5% - 69.3%)                                          | 1.59 (1.39 - 1.83)  | <0.001<br><0.001† | 1.50 (1.29 - 1.74)  | <0.001<br><0.001† |
|                                  | 1 step better                   | *        | 59.4% (49.9% - 67.1%)                                          | 1.36 (1.06 - 1.72)  |                   | 1.31 (1.00 - 1.68)  |                   |
|                                  | No change                       | *        | 48.5% (44.9% - 51.8%)                                          | 1.00                |                   | 1.00                |                   |
|                                  | 1 step worse                    | *        | 38.5% (30.9% - 45.3%)                                          | 0.73 (0.57 - 0.93)  |                   | 0.77 (0.60 - 0.97)  |                   |
|                                  | $\geq 2$ steps worse (or to 4+) | *        | 35.0% (25.3% - 43.5%)                                          | 0.65 (0.46 - 0.89)  |                   | 0.64 (0.45 - 0.87)  |                   |
| Change in Vitreous Cells         | $\geq 2$ steps better (or to 0) | *        | 60.7% (55.8% - 65.1%)                                          | 1.34 (1.16 - 1.55)  | <0.001<br><0.001† | 1.24 (1.06 - 1.45)  | <0.01<br><0.001†  |
|                                  | 1 step better                   | *        | 55.0% (47.1% - 61.7%)                                          | 1.15 (0.93 - 1.40)  |                   | 1.30 (1.04 - 1.61)  |                   |
|                                  | No change                       | *        | 50.2% (46.5% - 53.6%)                                          | 1.00                |                   | 1.00                |                   |
|                                  | 1 step worse                    | *        | 41.8% (33.0% - 49.4%)                                          | 0.78 (0.59 - 1.01)  |                   | 0.90 (0.68 - 1.18)  |                   |
|                                  | $\geq 2$ steps worse (or to 4+) | *        | 38.5% (29.2% - 46.7%)                                          | 0.70 (0.51 - 0.93)  |                   | 0.73 (0.53 - 0.98)  |                   |
| Change in Vitreous Haze          | $\geq 2$ steps better (or to 0) | *        | 57.6% (51.0% - 63.2%)                                          | 1.15 (0.96 - 1.37)  | <0.001<br><0.001† | 1.17 (0.97 - 1.40)  | <0.01<br><0.001†  |
|                                  | 1 step better                   | *        | 58.1% (38.7% - 71.4%)                                          | 1.17 (0.70 - 1.81)  |                   | 1.21 (0.73 - 1.89)  |                   |
|                                  | No change                       | *        | 52.6% (49.4% - 55.5%)                                          | 1.00                |                   | 1.00                |                   |
|                                  | 1 step worse                    | *        | 13.5% (0.0% - 29.9%)                                           | 0.20 (0.03 - 0.60)  |                   | 0.22 (0.04 - 0.68)  |                   |
|                                  | $\geq 2$ steps worse (or to 4+) | *        | 33.4% (23.8% - 41.7%)                                          | 0.54 (0.39 - 0.74)  |                   | 0.62 (0.44 - 0.85)  |                   |
| Snowballs                        | No                              | *        | 51.8% (48.9% - 54.5%)                                          | 1.00                | 0.64              | 1.00                | 0.88              |
|                                  | Yes                             | *        | 54.6% (41.7% - 64.6%)                                          | 1.08 (0.78 - 1.45)  |                   | 1.03 (0.74 - 1.40)  |                   |
| Snowballs at ME Diagnosis        | No                              | 1389     | 51.2% (48.3% - 54.0%)                                          | 1.00                | 0.04              | 1.00                | 0.09              |
|                                  | Yes                             | 118      | 60.2% (50.9% - 67.8%)                                          | 1.28 (1.02 - 1.59)  |                   | 1.23 (0.96 - 1.55)  |                   |
| Snowbanking                      | No                              | *        | 52.4% (49.5% - 55.2%)                                          | 1.00                | 0.03              | 1.00                | 0.049             |
|                                  | Yes                             | *        | 38.3% (26.0% - 48.6%)                                          | 0.65 (0.43 - 0.94)  |                   | 0.67 (0.43 - 0.99)  |                   |
| Snowbanking at ME Diagnosis      | No                              | 1412     | 51.9% (48.9% - 54.6%)                                          | 1.00                | 0.87              | 1.00                | 0.89              |
|                                  | Yes                             | 95       | 52.6% (43.4% - 60.3%)                                          | 1.02 (0.79 - 1.30)  |                   | 1.02 (0.77 - 1.33)  |                   |
| HLA-B27                          | No                              | 1419     | 51.4% (48.5% - 54.1%)                                          | 1.00                | 0.12              | 1.00                | 0.51              |
|                                  | Yes                             | 91       | 60.2% (47.1% - 70.1%)                                          | 1.28 (0.99 - 1.62)  |                   | 1.10 (0.85 - 1.42)  |                   |
| Cataract Surgery prior to ME     | No                              | 1114     | 53.3% (50.1% - 56.3%)                                          | 1.00                | 0.08              | 1.00                | 0.07              |
|                                  | Aphakic                         | 135      | 44.2% (36.1% - 51.4%)                                          | 0.77 (0.61 - 0.96)  |                   | 0.75 (0.58 - 0.95)  |                   |
|                                  | Pseudophakic                    | 261      | 49.9% (44.3% - 55.0%)                                          | 0.91 (0.77 - 1.07)  |                   | 0.88 (0.74 - 1.05)  |                   |
| Glaucoma Surgery Prior to ME     | No                              | 1457     | 52.1% (49.2% - 54.8%)                                          | 1.00                | 0.45              | 1.00                | 0.84              |
|                                  | Yes                             | 53       | 46.6% (31.2% - 58.6%)                                          | 0.85 (0.59 - 1.19)  |                   | 0.96 (0.65 - 1.36)  |                   |

**Table 4: Risk Factors for ≥2 Lines Improvement of Macular Edema-Induced Reduction of Visual Acuity**

|                                            |     |          | <b>Estimated Proportion Resolved (95% Confidence Interval)</b> | <b>Unadjusted</b>   |                | <b>Adjusted**</b>   |                |
|--------------------------------------------|-----|----------|----------------------------------------------------------------|---------------------|----------------|---------------------|----------------|
|                                            |     | <b>N</b> | <b>6-Month</b>                                                 | <b>Hazard Ratio</b> | <b>p-value</b> | <b>Hazard Ratio</b> | <b>p-value</b> |
| Pars Plana Vitrectomy Prior to ME          | No  | 1350     | 52.4% (49.4% - 55.2%)                                          | 1.00                | 0.21           | 1.00                | 0.73           |
|                                            | Yes | 160      | 47.8% (40.6% - 54.2%)                                          | 0.88 (0.71 - 1.07)  |                | 0.96 (0.75 - 1.22)  |                |
| Posterior Synechiae                        | No  | *        | 52.4% (49.4% - 55.2%)                                          | 1.00                | 0.29           | 1.00                | 0.01           |
|                                            | Yes | *        | 49.0% (42.7% - 54.6%)                                          | 0.91 (0.76 - 1.08)  |                | 0.78 (0.64 - 0.94)  |                |
| Peripheral Anterior Synechiae              | No  | *        | 51.9% (49.1% - 54.6%)                                          | 1.00                | 0.53           | 1.00                | 0.78           |
|                                            | Yes | *        | 46.2% (25.1% - 61.3%)                                          | 0.85 (0.47 - 1.38)  |                | 0.93 (0.52 - 1.52)  |                |
| Epiretinal Membrane                        | No  | *        | 52.9% (49.6% - 55.9%)                                          | 1.00                | 0.19           | 1.00                | 0.49           |
|                                            | Yes | *        | 49.6% (45.1% - 53.7%)                                          | 0.91 (0.80 - 1.04)  |                | 0.95 (0.83 - 1.09)  |                |
| Hypotony (<5 mmHg)                         | No  | *        | 52.2% (49.3% - 54.9%)                                          | 1.00                | <0.01          | 1.00                | <0.01          |
|                                            | Yes | *        | 14.6% (0.0% - 27.3%)                                           | 0.21 (0.07 - 0.50)  |                | 0.21 (0.06 - 0.49)  |                |
| Ocular hypertension (>21 mmHg)             | No  | *        | 51.2% (48.2% - 54.0%)                                          | 1.00                | 0.11           | 1.00                | 0.32           |
|                                            | Yes | *        | 57.3% (49.3% - 64.0%)                                          | 1.19 (0.97 - 1.44)  |                | 1.11 (0.90 - 1.36)  |                |
| Topical prostaglandin analogues            | No  | *        | 52.1% (49.2% - 54.8%)                                          | 1.00                | 0.34           | 1.00                | 0.66           |
|                                            | Yes | *        | 40.8% (14.8% - 58.9%)                                          | 0.71 (0.32 - 1.33)  |                | 0.85 (0.39 - 1.61)  |                |
| Topical carbonic anhydrase inhibitors      | No  | *        | 52.3% (49.3% - 55.1%)                                          | 1.00                | 0.20           | 1.00                | 0.47           |
|                                            | Yes | *        | 47.2% (39.2% - 54.1%)                                          | 0.86 (0.66 - 1.11)  |                | 0.92 (0.70 - 1.19)  |                |
| Oral non-steroidal anti-inflammatory drugs | No  | *        | 51.7% (48.8% - 54.5%)                                          | 1.00                | 0.33           | 1.00                | 0.74           |
|                                            | Yes | *        | 55.9% (46.6% - 63.6%)                                          | 1.12 (0.88 - 1.41)  |                | 1.04 (0.81 - 1.31)  |                |
| Oral acetazolamide                         | No  | *        | 51.8% (48.9% - 54.5%)                                          | 1.00                | 0.29           | 1.00                | 0.27           |
|                                            | Yes | *        | 59.0% (43.2% - 70.4%)                                          | 1.22 (0.86 - 1.67)  |                | 1.22 (0.86 - 1.67)  |                |

\* Time updated covariates vary in their number at risk over time, and therefore cannot be represented by a single number.

\*\* Adjusted smoking, primary uveitis diagnosis, visual acuity at diagnosis of ME, uveitis category, overall activity at ME diagnosis, change in anterior chamber cells, HLA-B27 status, cataract surgery prior to ME, hypotony (<5 mmHg), and ocular hypertension (>21 mmHg). Time-varying inflammatory activity markers were not adjusted by change in anterior chamber cells (see Methods for explanation).

† Test of linear trend across categories.

Abbreviations: n/a = not applicable; ME = macular edema.
